# Supplementary material for: Consumption of alcohol and blood pressure: Results of the ELSA-Brasil study
Source: PubMed Central journal article supplement (PMC5757983; doi:10.1371/journal.pone.0190239), 2018-01-08
Supplement: pone.0190239.s002.pdf [file pone.0190239.s002.pdf]

| <b>NAME</b>              | <b>CAPTIONS</b>                                                                                    |
|--------------------------|----------------------------------------------------------------------------------------------------|
| <b>ID</b>                | Number of participants                                                                             |
| <b>RCTA8</b>             | Sex<br>Masculino = Men<br>Feminno = Woman                                                          |
| <b>IDADEA</b>            | Age in years                                                                                       |
| <b>ANTA3</b>             | Height (cm)                                                                                        |
| <b>HFDA07</b>            | Family history of hypertension<br>Sim = Yes<br>Não = No                                            |
| <b>A_PESO</b>            | Weight (kg)                                                                                        |
| <b>A_IMC1</b>            | BMI (kg/m <sup>2</sup> )                                                                           |
| <b>A_CINT</b>            | Waist circumference                                                                                |
| <b>A_RENDAPERCAPITA</b>  | Income per capita (Brazilian reais)                                                                |
| <b>A_FUMANTE</b>         | Smoker<br>Nunca fumo = Never<br>Ex fumante = Ex-smoker<br>Fumante = Current smoker                 |
| <b>A_USODEALCOOL</b>     | Alcohol use<br>Nunca usou = Never<br>Ex usuário = Ex- alcohol use<br>Usuário = Current alcohol use |
| <b>A_VOLALCGR</b>        | Amount of alcohol ingested per week in g                                                           |
| <b>A_BEBEXCESSIVO</b>    | Excessive drinker (M: $\geq 210$ g/w; W: $\geq 140$ g/w)<br>Sim = Yes<br>Não = No                  |
| <b>A_ATIVFISICA</b>      | Physical activity at leisure<br>Fraca= Weak<br>Moderada= Moderate<br>Forte= Vigorous               |
| <b>A_MEDANTHIPERT</b>    | Use of antihypertensive medication<br>Sim = Yes<br>Não = No                                        |
| <b>MEDIA_SIS</b>         | Mean systolic blood pressure                                                                       |
| <b>MEDIA_DIAS</b>        | Mean diastolic blood pressure                                                                      |
| <b>HA_SIS</b>            | Presence of systolic blood pressure elevated<br>Sim = Yes<br>Não = No                              |
| <b>HA_DIAS</b>           | Presence of diastolic blood pressure elevated<br>Sim = Yes<br>Não = No                             |
| <b>HA_SISTEMICA</b>      | Presence of systolic and/or diastolic blood pressure elevated<br>Sim = Yes<br>Não = No             |
| <b>CLASS_HAS</b>         | Classification of blood pressure<br>Normal = Normal<br>Elevada = Elevated                          |
| <b>CLASS_EXCPESO_IMC</b> | Classification of the presence of excess weight according                                          |

|                         |                                                                                                                                                                                                                                                                                                          |
|-------------------------|----------------------------------------------------------------------------------------------------------------------------------------------------------------------------------------------------------------------------------------------------------------------------------------------------------|
|                         | <p>to BMI<br/> Sim = Yes (BMI <math>\geq 25</math> kg/m<sup>2</sup>)<br/> Não = No (BMI <math>&lt; 25</math> kg/m<sup>2</sup>)</p>                                                                                                                                                                       |
| <b>CLASS_EXCPESO_CC</b> | <p>Classification of presence of excess weight according WC<br/> (M: <math>\geq 94</math>cm; W: <math>\geq 80</math> cm)<br/> Sim = Yes<br/> Não = No</p>                                                                                                                                                |
| <b>CLASS_RACA_COR</b>   | <p>Race /colour classification<br/> Branco = WhiteS<br/> Não Branco = Non-whites</p>                                                                                                                                                                                                                     |
| <b>CLASS_ESCOL</b>      | <p>Classification of schooling<br/> Fundamental = Primary (<math>\leq 8</math> y)<br/> Médio = Secondary (9-11 y)<br/> Superior = Higher (<math>\geq 12</math> y)</p>                                                                                                                                    |
| <b>MENOPAUSA</b>        | <p>Natural Menopause<br/> Sim = Yes<br/> Não = No</p>                                                                                                                                                                                                                                                    |
| <b>CONSUMODEALCOOL</b>  | <p>Current alcohol consumption g/week<br/> Abstêmios = Abstemious (0 g/w)<br/> Moderado = Moderate drinkers (M: 1 to <math>&lt; 210</math> g/w; W: 1 to <math>&lt; 140</math> g/w)<br/> Excessivo = Excessive drinkers (M: <math>\geq 210</math> g/w; W: <math>\geq 140</math> g/w)</p>                  |
| <b>ALCOOLREFEICOES</b>  | <p>Consumption of alcohol with meals in 3 categories<br/> Sempre ou maioria junto às refeições = Most frequently with meals<br/> Tanto junto quanto fora das refeições = Both with and outside of meals<br/> Nunca ou maioria fora das refeições = Most frequently outside of meals</p>                  |
| <b>BINGE5CAT</b>        | <p>Frequency of binge drinking<br/> Nunca = Never<br/> Somente em ocasiões especiais = Occasionally<br/> 2 ou 3x por mês = 2-3x/month<br/> 1 a 2x por semana = 1-2x/week<br/> Praticamente todos ou dias ou mais de 1x ao dia = Almost daily or <math>&gt; 1x/day</math></p>                             |
| <b>BINGE2CAT</b>        | <p>Binge drinking 2 categories (<math>\geq 5</math> drinks within a two hour period more than once a month)<br/> Sim = Yes<br/> Não = No</p>                                                                                                                                                             |
| <b>ALCOOLGSEMCAT</b>    | <p>Alcohol consumption g/week (categories)<br/> Abstêmios = Abstemious<br/> 0 – 139,99 g/semana = 0 – 139,99 g/w<br/> 140 – 209,99 g/semana = 140 – 209,99 g/w<br/> 210 – 279,99 g/semana = 210 – 279,99 g/w<br/> 280 – 419,99 g/semana = 280 – 419,99 g/w<br/> 420 a 1074 g/semana = 420 a 1074 g/w</p> |
